# Supplementary material for: MIL-125(Ti)@ZIF-67-derived MIL-125(Ti)@TiO2 hollow nanodiscs decorated with Co3S4 for remarkable photocatalytic CO2 reduction
Source: Royal Society of Chemistry journal article supplement (doi:10.1039/d3cy00651d), 2023-01-01
Supplement: d3cy00651d1.pdf [file d3cy00651d1.pdf]

## Supporting Information

### MOF@MOF-derived hierarchical MIL-125(Ti)@TiO<sub>2</sub>/Co<sub>3</sub>S<sub>4</sub> hollow nanodiscs for remarkable photocatalytic CO<sub>2</sub> reduction

Qiuyu Zhang, Yajie Chen, Xinyan Yu, Yuejia Yin, Yaxin Ru, Guohui Tian\*

Key Laboratory of Functional Inorganic Material Chemistry, Ministry of Education of  
the People's Republic of China, Heilongjiang University, Harbin 150080 P. R. China.

E-mail: tiangh@hlju.edu.cn

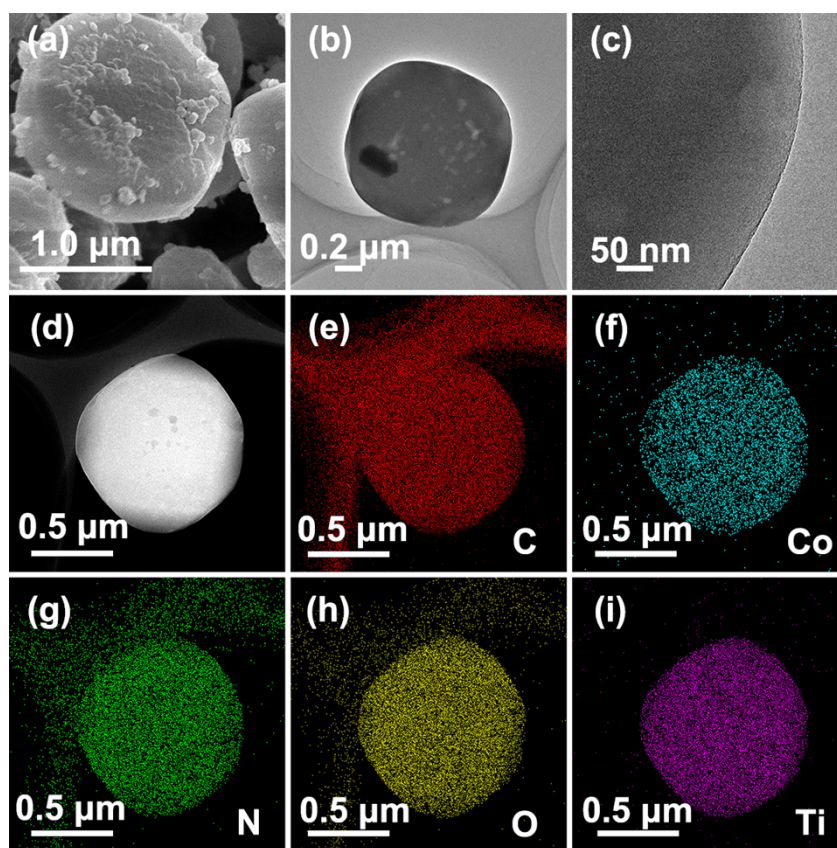

**Fig. S1.** (a) SEM, and (b, c) TEM images of MIL-125(Ti)@ZIF-67. (d) STEM image and corresponding elemental mappings for (e) C, (f) Co, (g) N, (h) O, and (i) Ti elements of MIL-125(Ti)@ZIF-67.

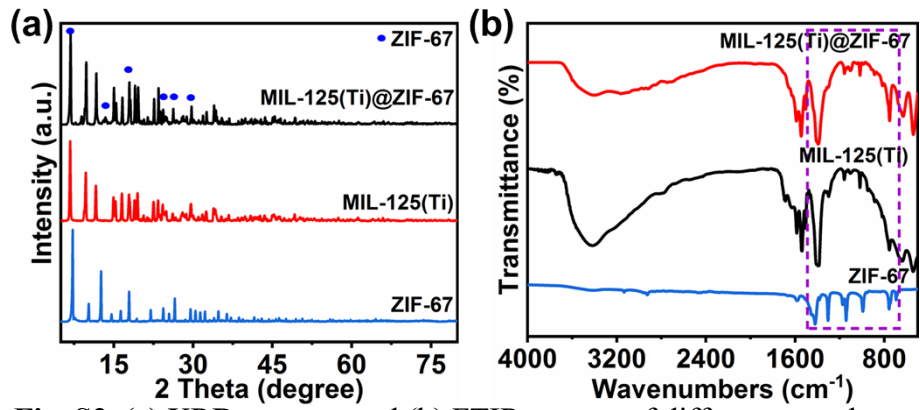

Fig. S2. (a) XRD patterns and (b) FTIR spectra of different samples.

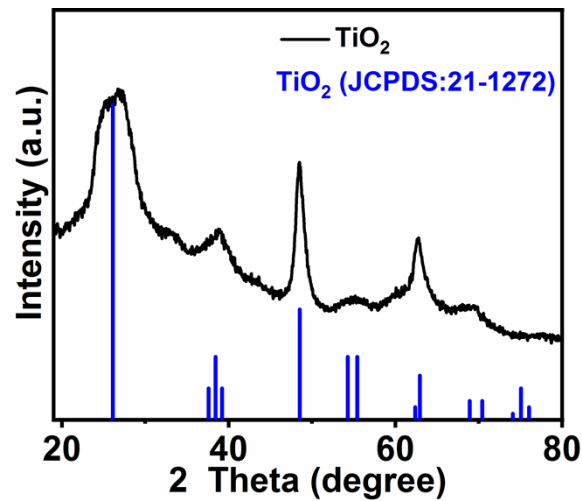

Fig. S3. XRD pattern of TiO<sub>2</sub>.

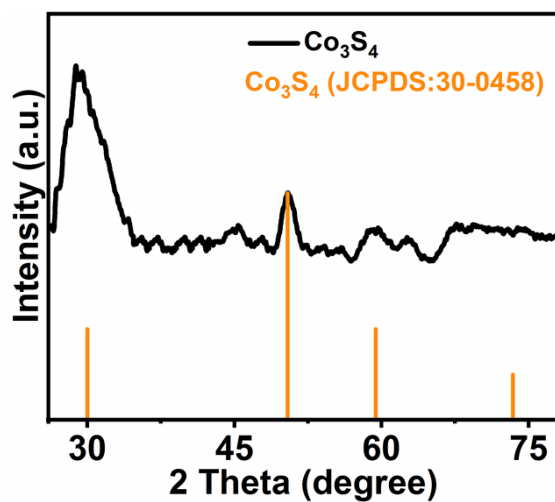

Fig. S4. XRD pattern of  $\text{Co}_3\text{S}_4$ .

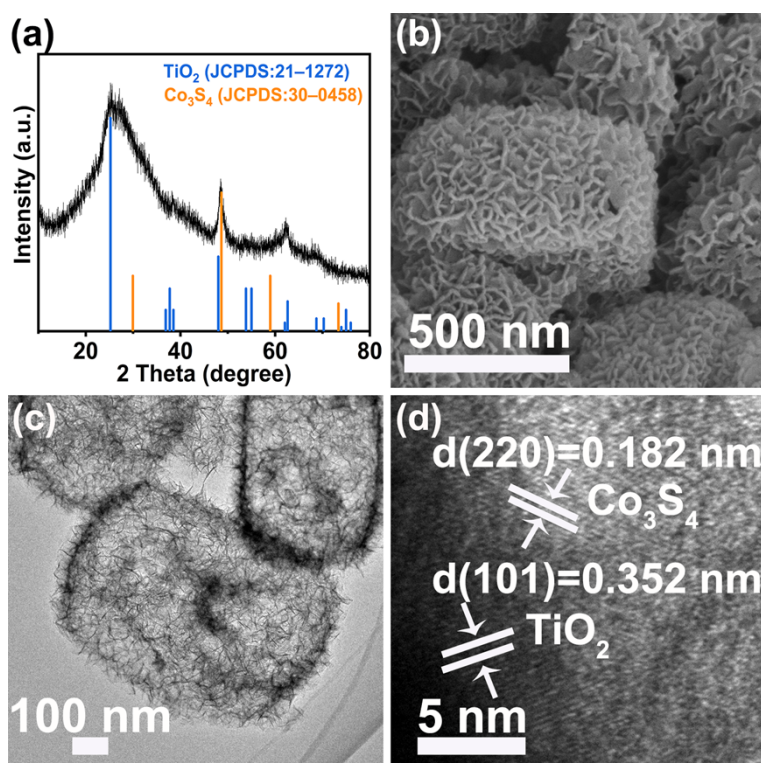

Fig. S5. (a) XRD pattern, (b) SEM, (c) TEM, and (d) HRTEM images of  $\text{TiO}_2/\text{Co}_3\text{S}_4$ .

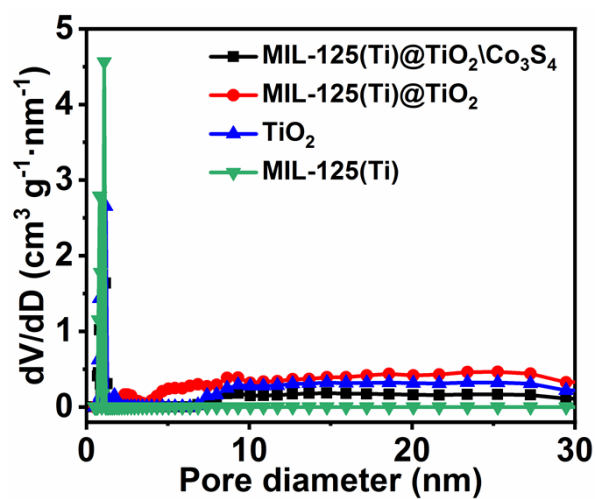

Fig. S6. Pore size distribution of different samples.

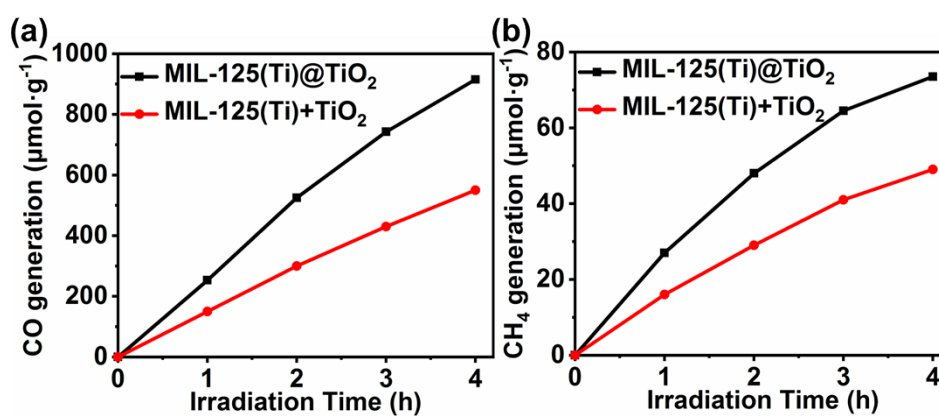

Fig. S7. Time courses of (a) CO and (b) CH<sub>4</sub> production from the single-component catalysts (MIL-125(Ti) and TiO<sub>2</sub>) and physical mixture of MIL-125(Ti) and TiO<sub>2</sub>.

**Table S1.** Summary of the surface area ( $S_{\text{BET}}$ ), pore volume and average pore size of the different samples.

| Samples                                                      | $S_{\text{BET}}$ ( $\text{m}^2 \text{g}^{-1}$ ) | pore volume<br>( $\text{cm}^3 \text{g}^{-1}$ ) | pore size distribution<br>(nm) |
|--------------------------------------------------------------|-------------------------------------------------|------------------------------------------------|--------------------------------|
| MIL-125(Ti)@TiO <sub>2</sub> \Co <sub>3</sub> S <sub>4</sub> | 306.2                                           | 0.854                                          | 0.80, 1.20, 5-30               |
| MIL-125(Ti)@TiO <sub>2</sub>                                 | 371.8                                           | 0.244                                          | 0.80, 1.18, 5-30               |
| TiO <sub>2</sub>                                             | 214.2                                           | 0.060                                          | 0.80, 1.16, 5-30               |
| MIL-125(Ti)                                                  | 872.5                                           | 0.056                                          | 0.80, 1.08                     |

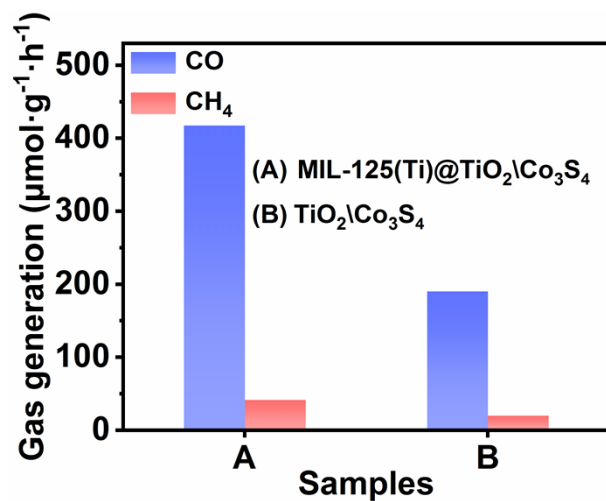

**Fig. S8.** Average CO and CH<sub>4</sub> generation rates over different catalysts, over MIL-125(Ti)@TiO<sub>2</sub>\Co<sub>3</sub>S<sub>4</sub> and TiO<sub>2</sub>\Co<sub>3</sub>S<sub>4</sub>.

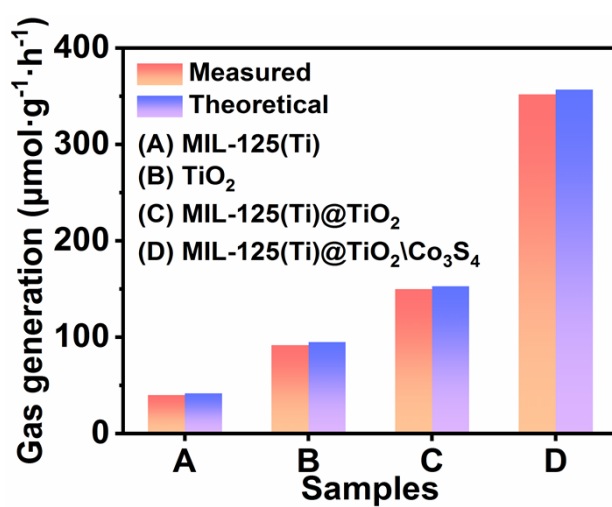

**Fig. S9.** The O<sub>2</sub> evolution rate over different photocatalysts.

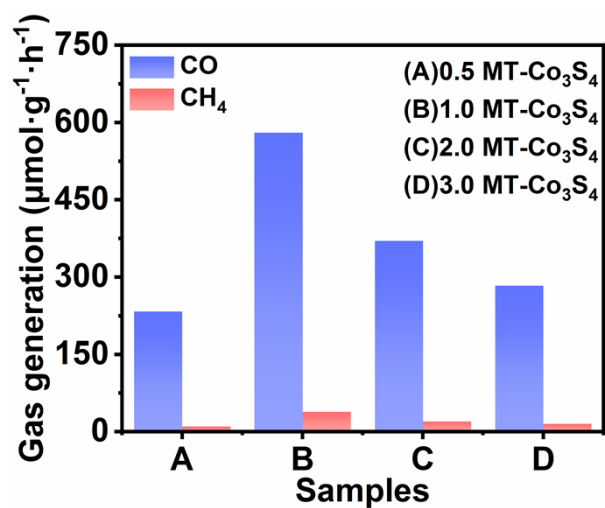

**Fig. S10.** Yields of different products with different contents of Co<sub>3</sub>S<sub>4</sub>.

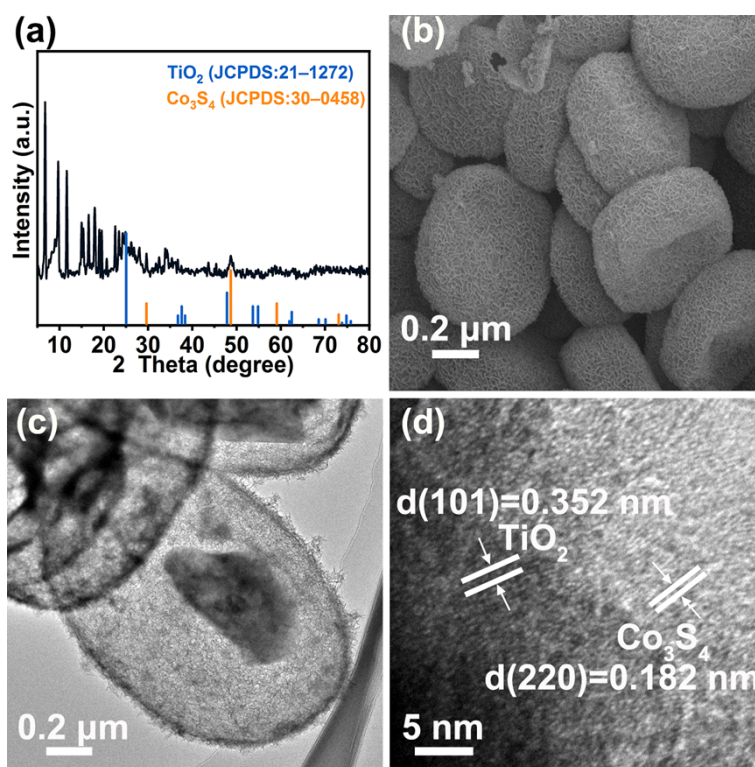

**Fig. S11.** (a) XRD pattern, (b) SEM, (c) TEM, and (d) HRTEM images of MIL-125(Ti)@TiO<sub>2</sub>/Co<sub>3</sub>S<sub>4</sub> after cycle tests.

**Table S2.** Comparative photocatalytic performance of different photocatalysts.

| Photocatalytic                                               | Yield Rate of<br>CO<br>( $\mu\text{mol}\cdot\text{g}^{-1}\cdot\text{h}^{-1}$ ) | Yield Rate of<br>CH <sub>4</sub><br>( $\mu\text{mol}\cdot\text{g}^{-1}\cdot\text{h}^{-1}$ ) | Selectivity<br>for CO<br>(%) | Apparent<br>Quantum<br>Efficiency<br>(%) |
|--------------------------------------------------------------|--------------------------------------------------------------------------------|---------------------------------------------------------------------------------------------|------------------------------|------------------------------------------|
| MIL-125(Ti)                                                  | 83.49                                                                          | 9.12                                                                                        | 69.59                        | 2.81                                     |
| TiO <sub>2</sub>                                             | 159.01                                                                         | 16.60                                                                                       | 70.54                        | 5.28                                     |
| MIL-125(Ti)@TiO <sub>2</sub>                                 | 213.53                                                                         | 20.30                                                                                       | 72.44                        | 6.90                                     |
| MIL-125(Ti)@TiO <sub>2</sub> \Co <sub>3</sub> S <sub>4</sub> | 587.50                                                                         | 38.43                                                                                       | 79.26                        | 17.36                                    |

The equation for CO (%) selectivity was calculated as shown below:

$$\text{Selectivity for CO (\%)} = [2n(\text{CO})] / [2n(\text{CO}) + 8n(\text{CH}_4)]$$

Calculation of Apparent Quantum Yield (QE %):

The apparent quantum yield (QE) is defined as the ratio of the number of reaction electrons to the number of incident photons. In principle, it takes two electrons to produce a CO molecule and eight electrons to produce a CH<sub>4</sub> molecule. The apparent quantum yield (QE) is measured using the following equation:

$$\text{QE (\%)} = \frac{2 \times N_a \times N_{(\text{CO})} + 8 \times N_a \times N_{(\text{CH}_4)}}{I \times A \times \frac{\lambda}{hc} \times t} \times 100\%$$

where  $N_a$  is Avogadro's number ( $N = 6.022 \times 10^{23} \text{ mol}^{-1}$ ),  $N(\text{CO})$  and  $N(\text{CH}_4)$  are the number of CO (mole) and CH<sub>4</sub> (mole) evolved at time "t" (1 h), respectively, I is the incident solar irradiance ( $I = 1.5 \text{ mW cm}^{-2}$ ), the 400 nm LED (5 W, Beijing Putian Light Technology Co. Ltd., China) is located 3.5 cm above the reactor, and the focusing area of the LED in the reactor is  $6.25 \text{ cm}^2$ .  $\lambda$  is the wavelength of this study (420 nm), h is Planck's constant ( $6.626 \times 10^{-34} \text{ J}\cdot\text{s}$ ), and c is the speed of light ( $3.0 \times 10^8 \text{ m s}^{-1}$ ).



**Table S3.** The catalytic activity reported in the literature for the production of CO by photocatalysis.

| Catalysts                                                    | Light source and intensity (mW/cm <sup>2</sup> ) | CO production (μmol g <sup>-1</sup> h <sup>-1</sup> ) | Ref       |
|--------------------------------------------------------------|--------------------------------------------------|-------------------------------------------------------|-----------|
| 0D/2D Au/TiO <sub>2</sub>                                    | 300W Xe lamp; 100                                | 19.75                                                 | [S1]      |
| NH <sub>2</sub> -MIL-125                                     | 300W Xe lamp; not provided                       | 8.25                                                  | [S2]      |
| TiO <sub>2</sub> @CTF-Py/CoCl <sub>2</sub>                   | 300W Xe lamp; not provided                       | 43.34                                                 | [S3]      |
| Co-ZIF-67@a-TiO <sub>2</sub>                                 | 300W Xe lamp; not provided                       | 43.8                                                  | [S4]      |
| TiO <sub>2</sub> @NH <sub>2</sub> -MIL-125                   | 300W Xe lamp; 203                                | 106.16                                                | [S5]      |
| Co <sub>3</sub> O <sub>4</sub> /TiO <sub>2</sub>             | 300W Xe lamp; not provided                       | 1256                                                  | [S6]      |
| MIL-125(Ti)@TiO <sub>2</sub> \Co <sub>3</sub> S <sub>4</sub> | 300W Xe lamp; 100                                | 587.5                                                 | This work |

**Table S4.** The determined energy band parameters of the samples

| Sample                         | E <sub>g</sub> (eV) | E <sub>f</sub> (V) | XPS VB (eV) | E <sub>VB</sub> (V) | E <sub>CB</sub> (V) |
|--------------------------------|---------------------|--------------------|-------------|---------------------|---------------------|
| MIL-125(Ti)                    | 3.62                | -0.70              | 3.61        | 2.91                | -0.71               |
| TiO <sub>2</sub>               | 3.24                | -0.40              | 2.98        | 2.58                | -0.66               |
| Co <sub>3</sub> S <sub>4</sub> | 2.17                | 0.73               | 0.42        | 1.15                | -1.02               |

## References

- S1 R. Wang, J. Shen, K. Sun, H. Tang and Q. Liu, *Appl. Surf. Sci.*, 2019, **493**, 1142–1149.
- S2 X.-M. Cheng, X.-Y. Dao, S.-Q. Wang, J. Zhao and W.-Y. Sun, *ACS Catal.*, 2021, **11**, 650–658.
- S3 Z. Xu, Y. Cui, D. J. Young, J. Wang, H.-Y. Li, G.-Q. Bian and H.-X. Li, *J. CO<sub>2</sub> Util.*, 2021, **49**, 101561.
- S4 H. Wang, D. Wu, C. Yang, H. Lu, Z. Gao, F. Xu and K. Jiang, *J. CO<sub>2</sub> Util.*, 2019, **34**, 411–421.
- S5 Y. Huang, D. Wei, Z. Li, Y. Mao, Y. Huang, B. Jin, X. Luo and Z. Liang, *Sep. Purif. Technol.*, 2023, **310**, 123174.
- S6 Y. Ke, Q. Liang, S. Zhao, Z. Zhang, X. Li and Z. Li, *Inorg. Chem.*, 2022, **61**, 2652–2661.
